# Supplementary material
Source: PubMed Central journal article supplement (PMC1455478)
Supplement: NIHMS9527-supplement-supp1.pdf [file NIHMS9527-supplement-supp1.pdf]

## SUPPLEMENTAL DATA

Fig. S1. **SPR and FACS analysis.** *A*, Immunofluorescent staining of K562 cells, which highly express endogenous ICAM-1, using monomeric (thin line) or tetrameric (thick line) HA  $\alpha_L$  I I domain in the presence of 5 mM  $Mg^{2+}$  or EDTA as control (grey region). *B*, Wild-type ICAM-1 was immobilized on the sensor chip. Monomeric HA  $\alpha_L$  I domain with or without a BirA enzyme recognition tag was injected at 100 nM in the presence of 1 mM  $Mg^{2+}$  or EDTA. *a*, HA  $\alpha_L$  I domain with tag,  $Mg^{2+}$ ; *b*, HA  $\alpha_L$  I domain without tag,  $Mg^{2+}$ ; *c*, HA  $\alpha_L$  I domain with tag, EDTA; *d*, HA  $\alpha_L$  I domain without tag, EDTA. *C*, Tetrameric HA  $\alpha_L$  I domain was injected over the ICAM-1 immobilized chip at 50 nM in the presence of 1 mM  $Mg^{2+}$  (*a*) or EDTA (*b*); *D*, Representative dot plots of flow cytometric analysis of 293T ICAM-1 transfectants showing staining for mAb CBR IC1/11 and  $\alpha_L$  I domain tetramer. Population percentages are indicated in the quadrants.

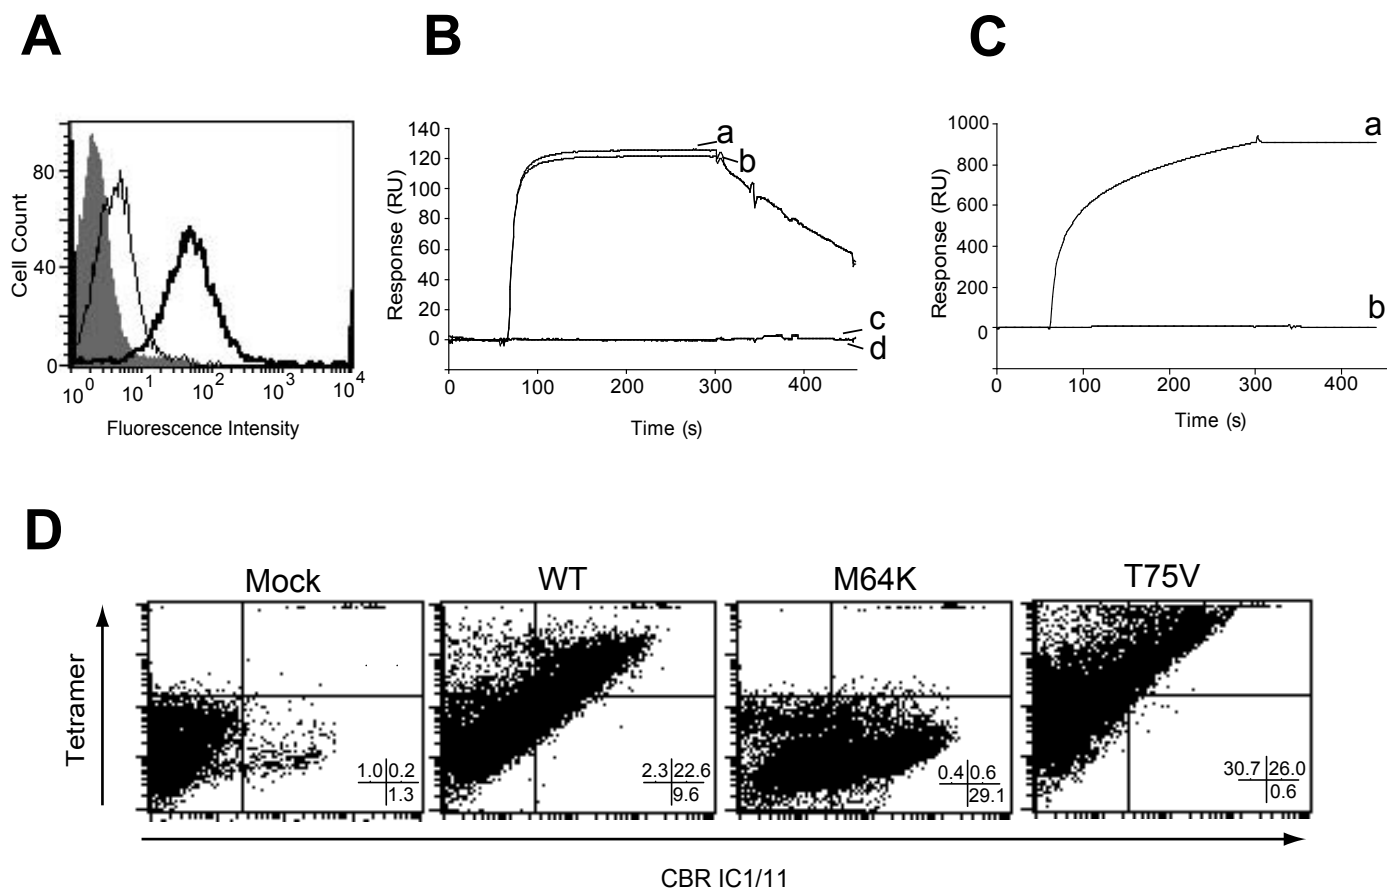

Fig. S1
